# Supplementary material for: V-synthes2 - the Next Generation Tool for Structure-based Virtual Screening of Giga-scale Chemical Spaces
Source: Research Square preprint supplement (doi:10.21203/rs.3.rs-7782723/v1), 2025-10-13
Supplement: Supplementary file 1 [file 46f11e78a46d4fa59ad5bde6.docx]

Supporting Information

**V-SYNTHES2 - THE NEXT GENERATION TOOL FOR STRUCTURE-BASED VIRTUAL SCREENING OF GIGA-SCALE CHEMICAL SPACES**

Antonina L. Nazarova1,2§, Anastasiia V. Sadybekov1,2§, Arman A. Sadybekov1§, Yurii S. Moroz3,4, Dmytro S. Radchenko4, Olga O. Tarkhanova5, Vsevolod Katritch1,2,6,7*

1Department of Quantitative & Computational Biology, University of Southern California, Los Angeles, CA 90089, USA

2Center for New Technologies in Drug Discovery and Development, University of Southern California, Los Angeles, CA 90089, USA

3Taras Shevchenko National University of Kyiv, Kyiv, Ukraine

4Enamine Ltd., Kyiv, Ukraine

5Chemspace LLC, Kyiv, Ukraine

6Department of Chemistry, Bridge Institute, USC Michelson Center for Convergent Biosciences, University of Southern California, Los Angeles, CA 90089, USA

7Department of Pharmacology and Pharmaceutical Sciences, University of Southern California, Los Angeles, CA 90089, USA

§These authors contributed to the study equally

*Corresponding authors: Vsevolod Katritch ([katritch@usc.edu](mailto:katritch@usc.edu))


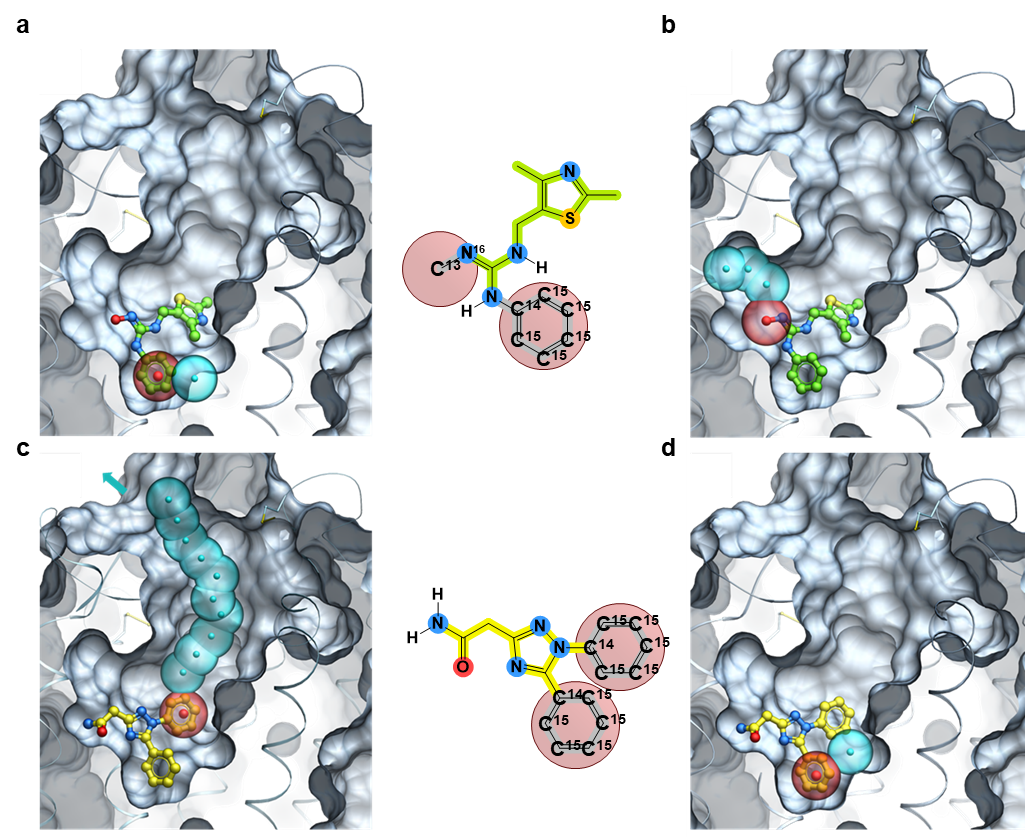


**Figure SI 1.** CapSelect's Automated Selection of MEL fragments in V-SYNTHES2 pipeline. Selection of optimal scaffold-MEL fragment combinations for extended molecule growth for 3-component and bridge-component reactions REAl Space subset. (a)-(b) 'Unproductive Outcome' where both aromatic and methyl-based capped R-group (red) are near a pocket's dead-end, showing a limited growth pathway and minimal space for a second synthon. The phenyl capped R-group allows only one non-capped sphere, while the methyl capped R-group permits three spheres, indicating space for a maximum of two methyl groups during enumeration; (c)-(d) 'Productive Outcome' where one capped R-group accommodates >10 spheres in the pocket, indicating sufficient space for an enumerated ligand's docking, even though another phenyl-based capped R-group faces an immediate sub-pocket crash. MEL fragment having two phenyl-capped R-groups, the potential to allocate several spheres on one group increases its likelihood of selection for enumeration, despite a clash in the other phenyl-based R route. The capped R-groups are depicted as red sticks at the 2D molecule representation and are encased in red transparent spheres in the docked 3D structures.


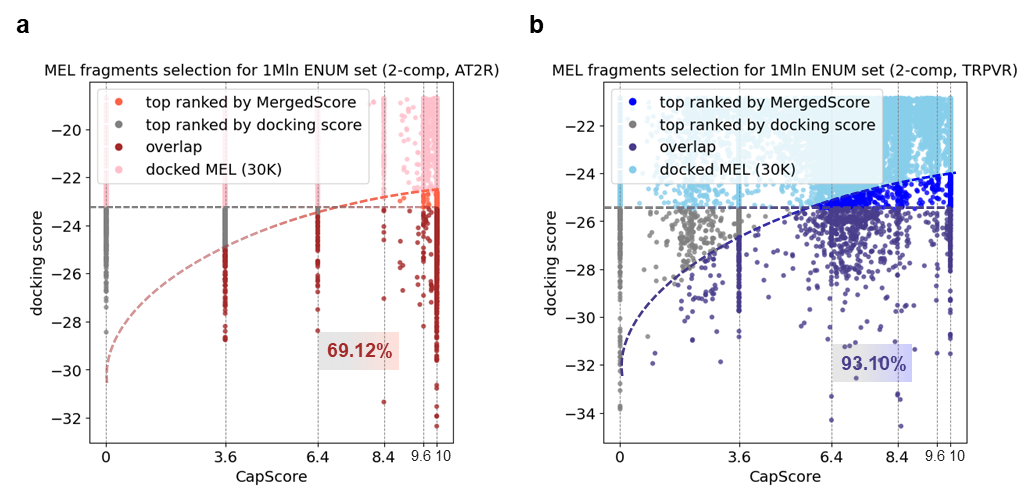


**Figure SI 2.** 2D diagram of docking score vs. CapScore for MEL docking results. 2D diagram showing the docking score vs. CapScore for MEL docking results, highlighting the selection of promising MEL fragments for the enumeration stage in the 2-component reaction set of V-SYNTHES2 screening for various receptor targets: (a) AT2 receptor – deep and narrow pocket receptor; (b) TRPV - shallow receptor pocket at the intersection of two receptor domains. The colored selection of the best-ranked fragments by the MergedScore corresponds to the number required to generate 1 million fully enumerated fragments. The number inside the intersection of MergedScore-based selected MEL with docking score-only selected MEL indicates the percentage of overlap between these two sets.

**
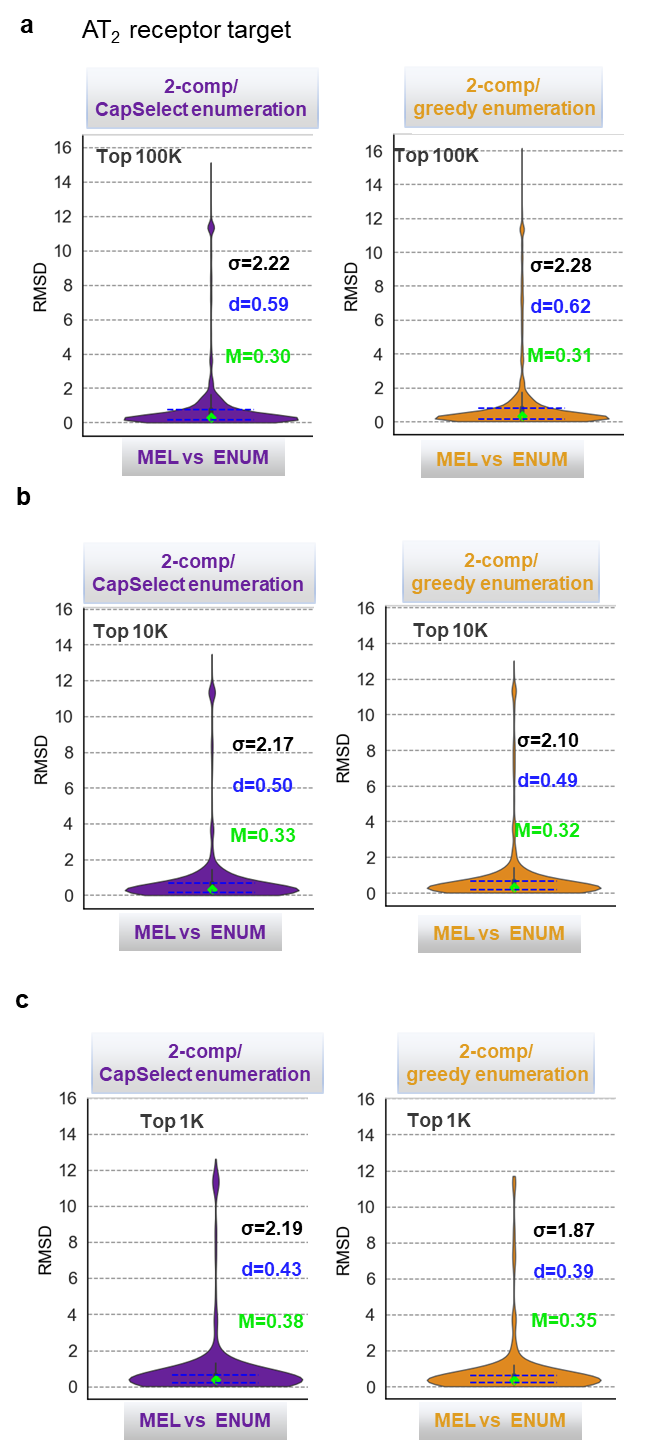
**

**Figure SI 3.** Violin plot visualization of RMSD values comparing the binding pose of the MEL fragment with the corresponding synthons of the fully enumerated molecules in 2-component reaction sets of V-SYNTHES2 for AT2 receptor screening. Promising MEL fragments were selected for the generation of the enumerated subset using docking score-only (greedy enumeration) or CapSelect-based strategies. Statistics are presented (a) for the first 100K compounds; (b) for the first 10K compounds and (c) the top 1K compounds with the highest docking scores. The lime dot in each plot indicates the median (M), while the blue dashed lines represent the quartiles, with the interquartile distance denoted as d and the statistical variance as σ.


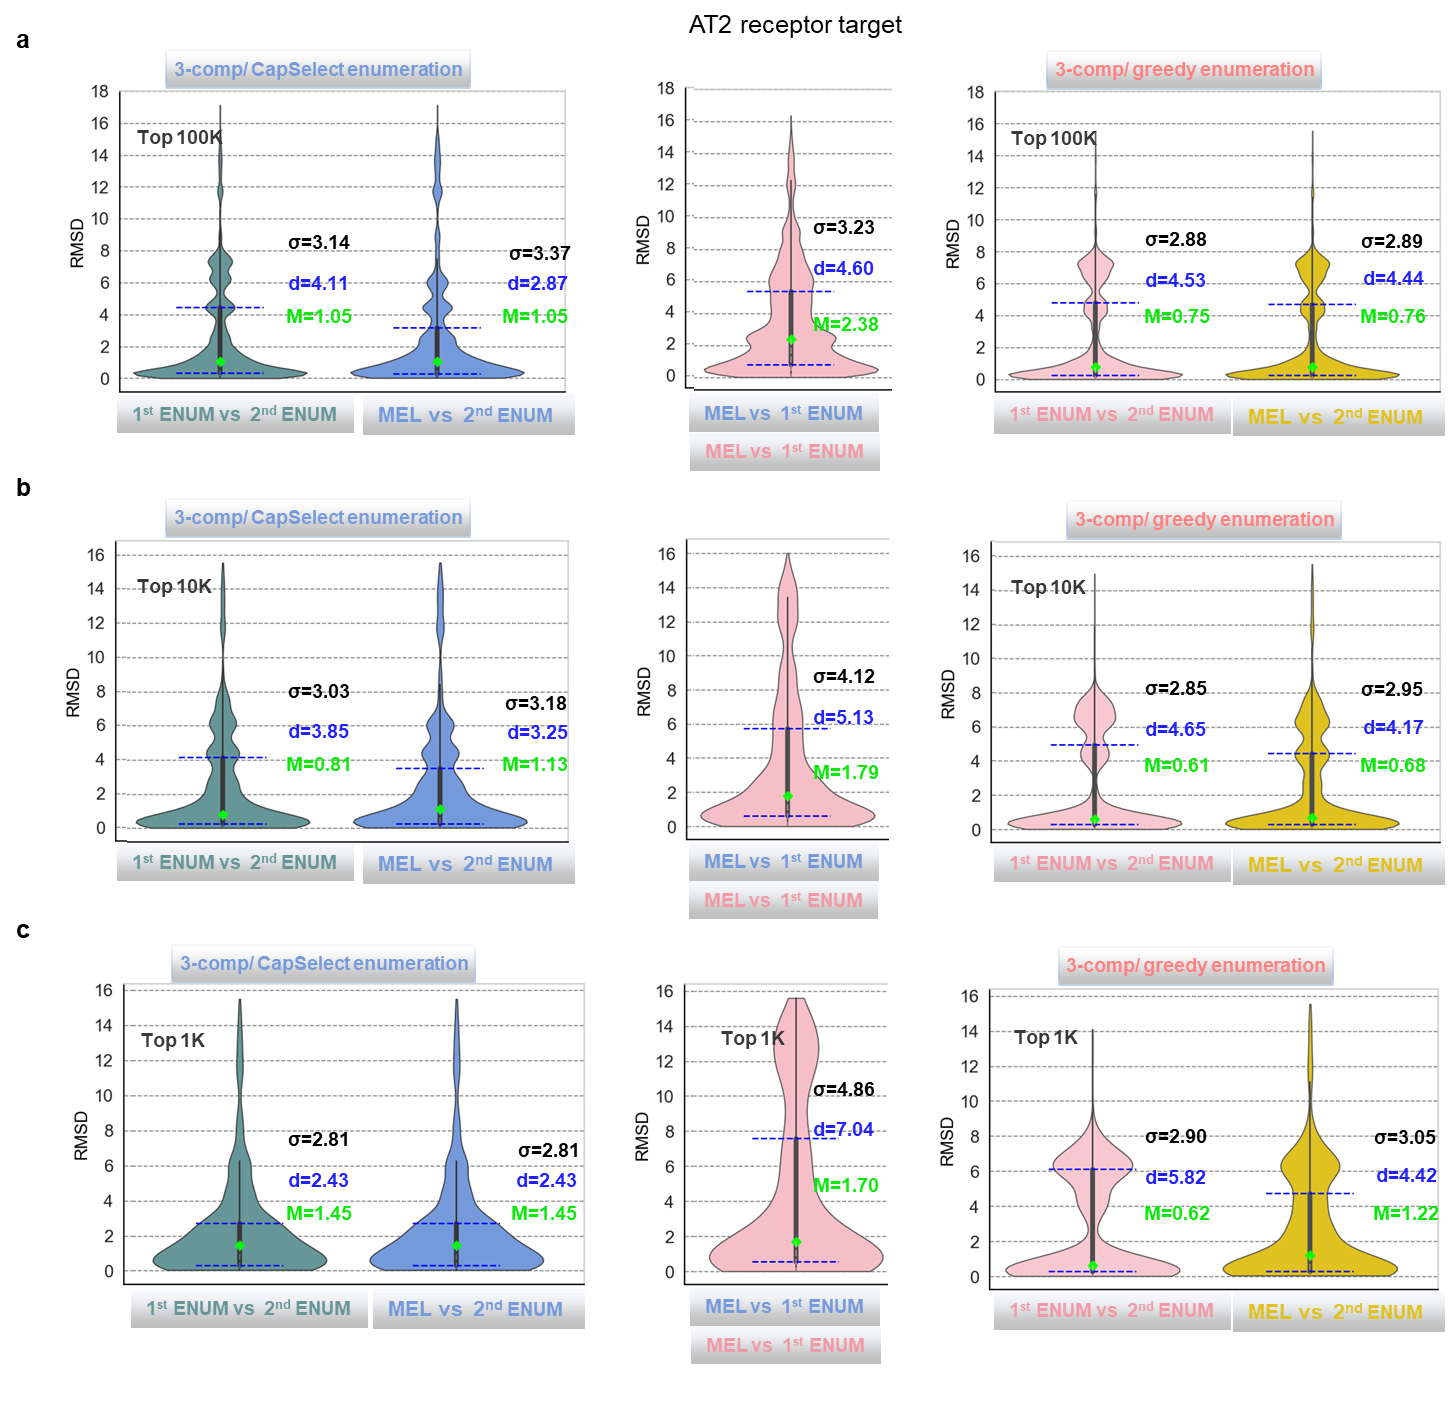


**Figure SI 4.** Violin plot visualization of RMSD values comparing the binding poses of the MEL fragment with the corresponding synthons of the fully enumerated molecules in the 3-component reaction set of V-SYNTHES2, which includes two stages of subsequent enumeration for AT2 receptor screening. For the initial stage, productive MEL fragments were selected based solely on docking scores after MEL docking. For the subsequent stages, promising MEL fragments were chosen using either docking score-only (greedy enumeration) or CapSelect-based strategies. Statistics are presented (a) for the first 100K compounds; (b) for the first 10K compounds and (c) the top 1K compounds with the highest docking scores. The lime dot in each plot indicates the median (M), while the blue dashed lines represent the quartiles, with the interquartile distance denoted as d and the statistical variance as σ.


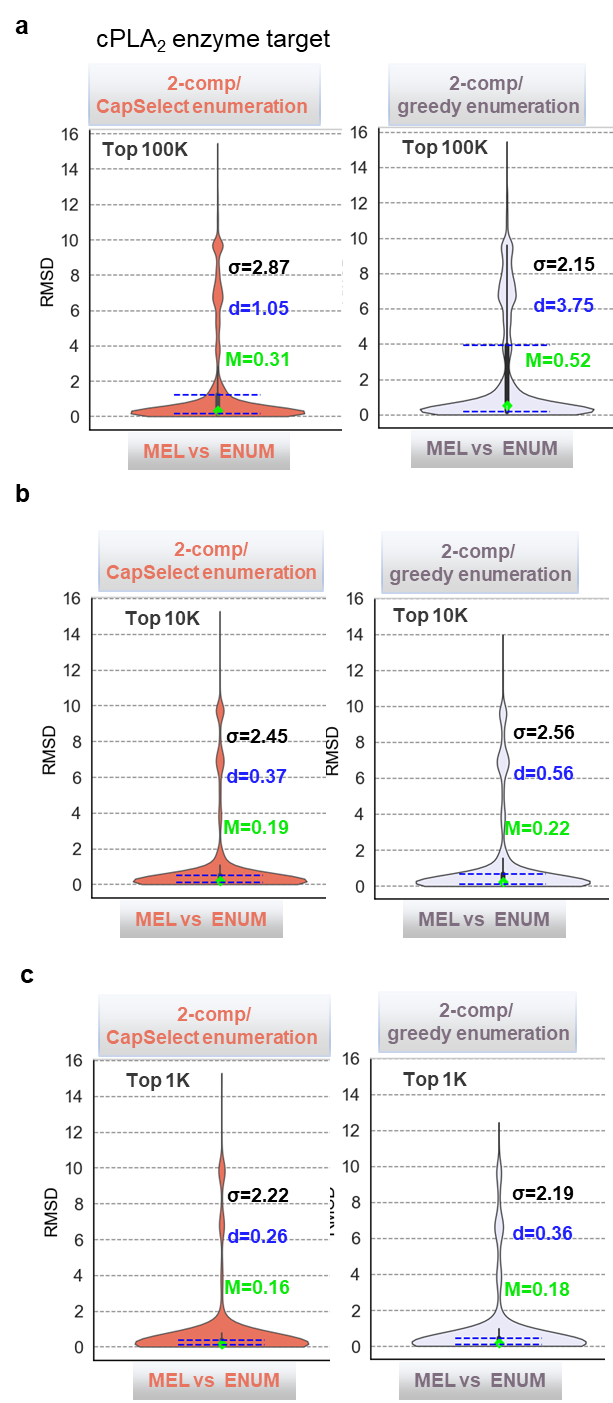


**Figure SI 5.** Violin plot visualization of RMSD values comparing the binding pose of the MEL fragment with the corresponding synthons of the fully enumerated molecules in 2-component reaction sets of V-SYNTHES2 for cPLA2 screening. Promising MEL fragments were selected for the generation of the enumerated subset using docking score-only (greedy enumeration) or CapSelect-based strategies. Statistics are presented (a) for the first 100K compounds; (b) for the first 10K compounds and (c) the top 1K compounds with the highest docking scores. The lime dot in each plot indicates the median (M), while the blue dashed lines represent the quartiles, with the interquartile distance denoted as d and the statistical variance as σ.


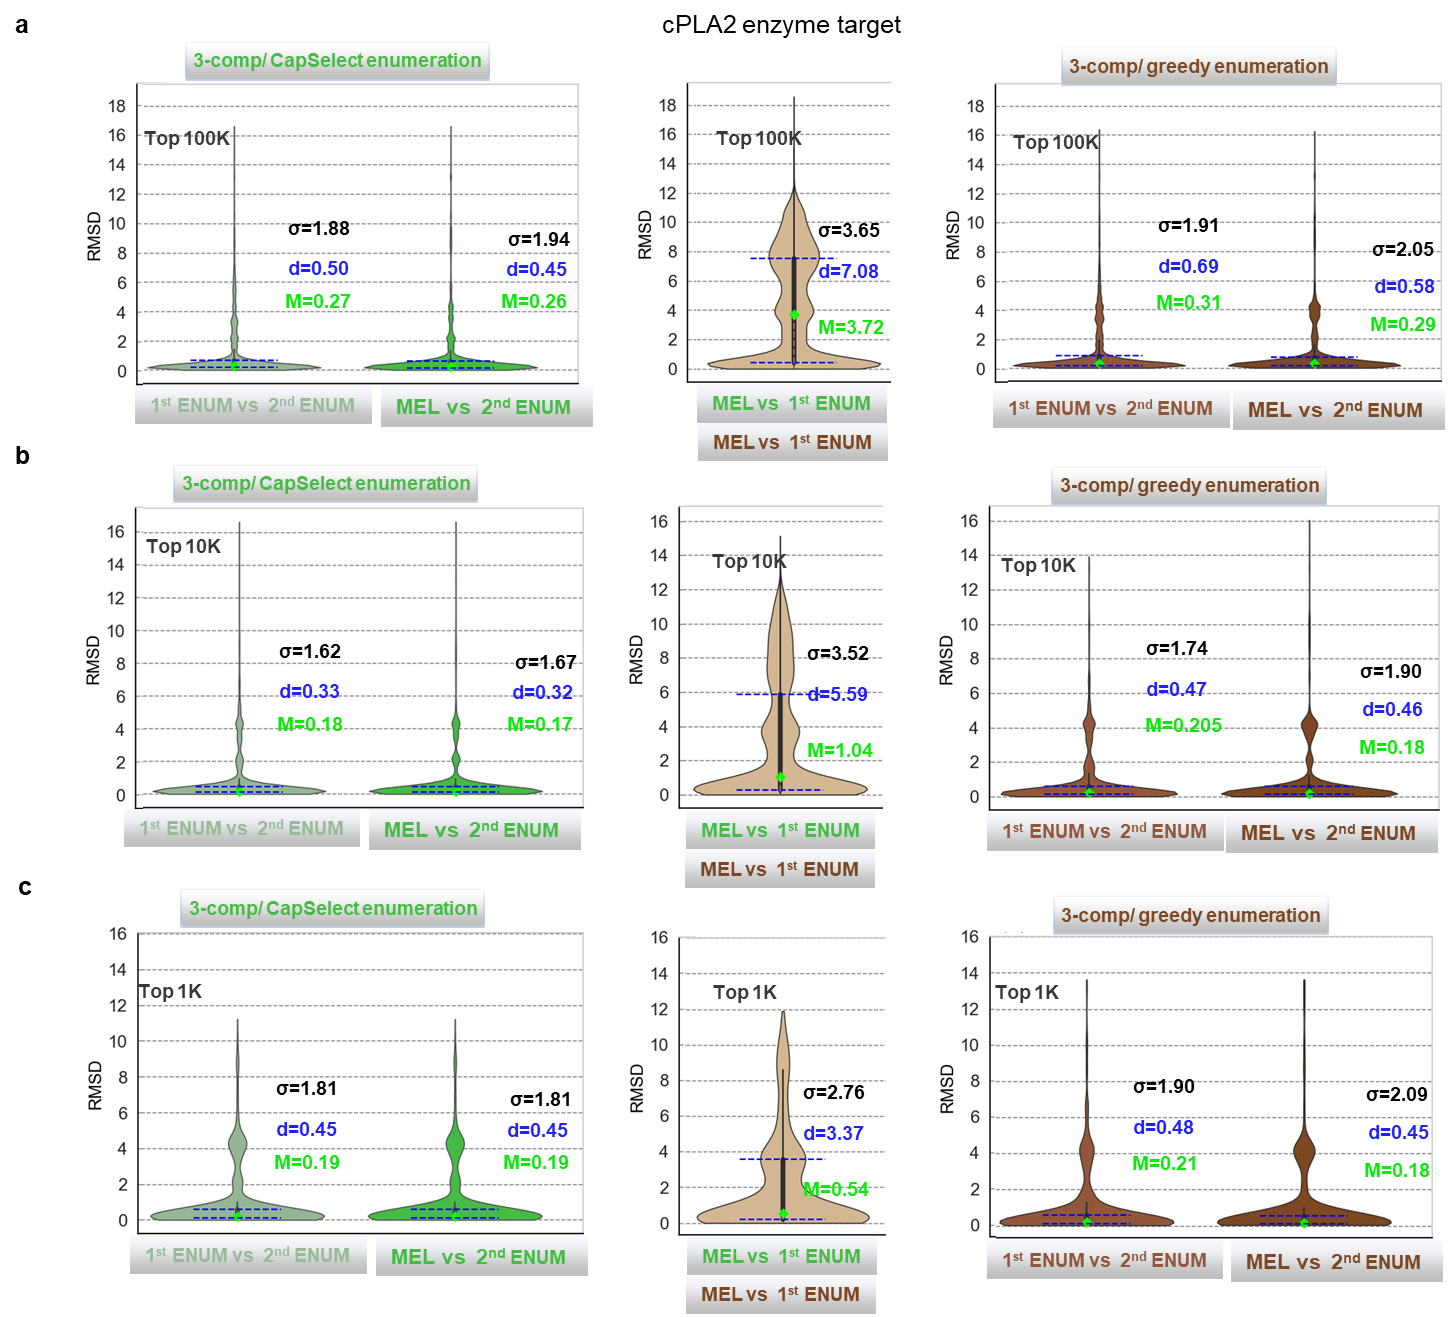


**Figure SI 6.** Violin plot visualization of RMSD values comparing the binding poses of the MEL fragment with the corresponding synthons of the fully enumerated molecules in the 3-component reaction set of V-SYNTHES2, which includes two stages of subsequent enumeration for cPLA2 screening. For the initial stage, productive MEL fragments were selected based solely on docking scores after MEL docking. For the subsequent stages, promising MEL fragments were chosen using either docking score-only (greedy enumeration) or CapSelect-based strategies. Statistics are presented (a) for the first 100K compounds; (b) for the first 10K compounds and (c) the top 1K compounds with the highest docking scores. The lime dot in each plot indicates the median (M), while the blue dashed lines represent the quartiles, with the interquartile distance denoted as d and the statistical variance as σ.


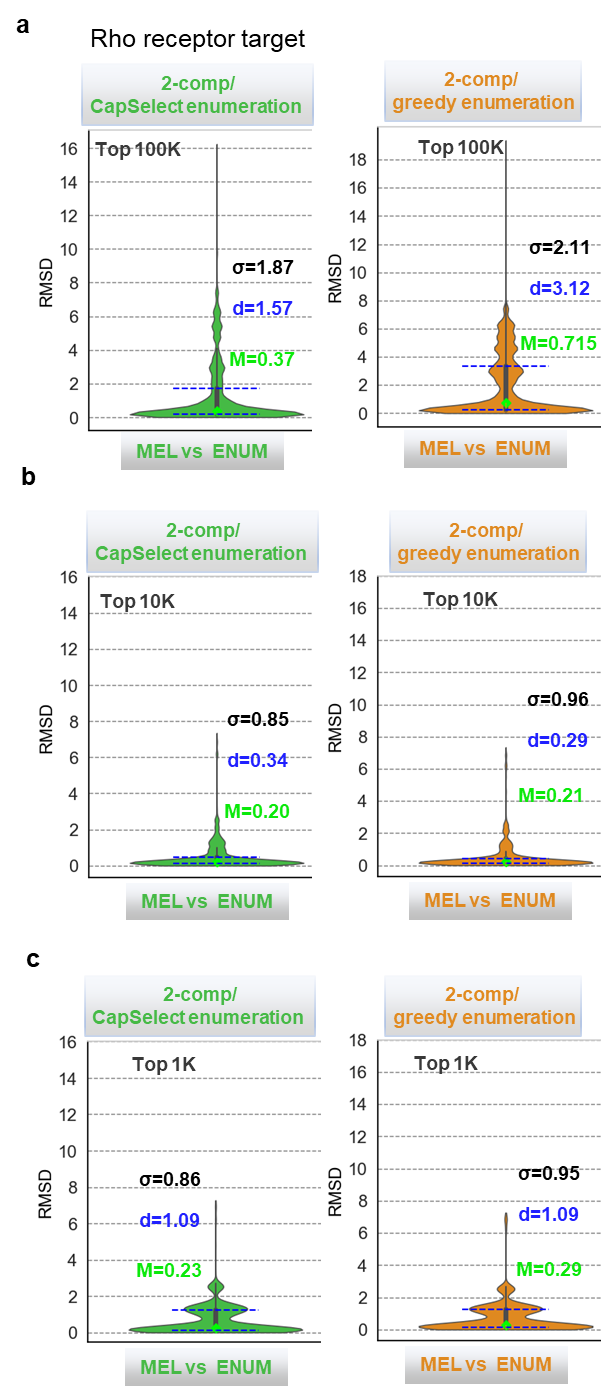


**Figure SI 7.** Violin plot visualization of RMSD values comparing the binding pose of the MEL fragment with the corresponding synthons of the fully enumerated molecules in 2-component reaction sets of V-SYNTHES2 for CB2 receptor screening. Promising MEL fragments were selected for the generation of the enumerated subset using docking score-only (greedy enumeration) or CapSelect-based strategies. Statistics are presented (a) for the first 100K compounds; (b) for the first 10K compounds and (c) the top 1K compounds with the highest docking scores. The lime dot in each plot indicates the median (M), while the blue dashed lines represent the quartiles, with the interquartile distance denoted as d and the statistical variance as σ.

**
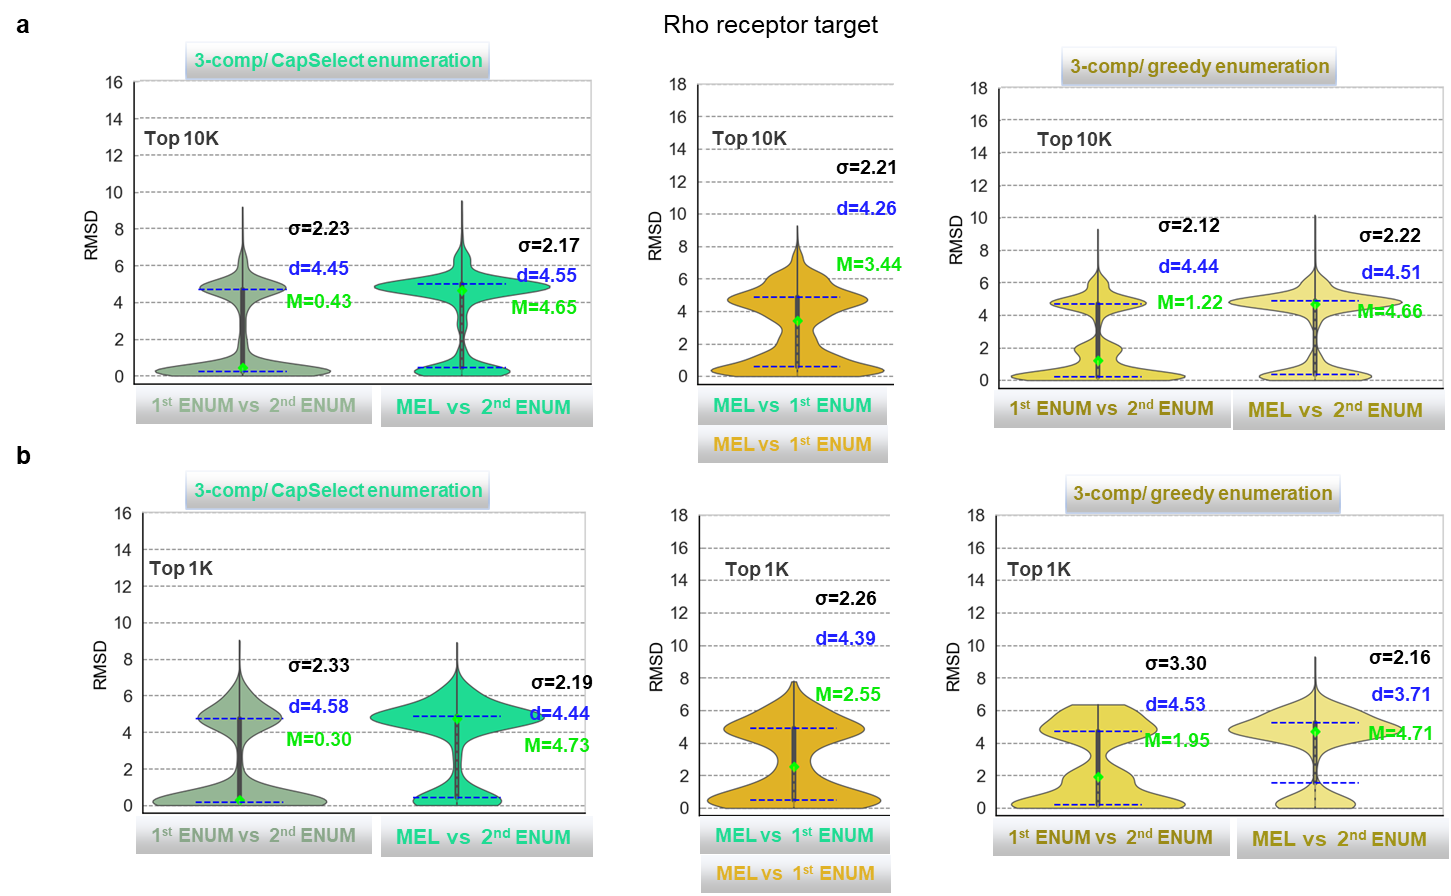
**

**Figure SI 8.** Violin plot visualization of RMSD values comparing the binding poses of the MEL fragment with the corresponding synthons of the fully enumerated molecules in the 3-component reaction set of V-SYNTHES2, which includes two stages of subsequent enumeration for CB2 receptor screening. For the initial stage, productive MEL fragments were selected based solely on docking scores after MEL docking. For the subsequent stages, promising MEL fragments were chosen using either docking score-only (greedy enumeration) or CapSelect-based strategies. Statistics are presented (a) for the first 10K compounds and (b) the top 1K compounds with the highest docking scores. The lime dot in each plot indicates the median (M), while the blue dashed lines represent the quartiles, with the interquartile distance denoted as d and the statistical variance as σ.

**
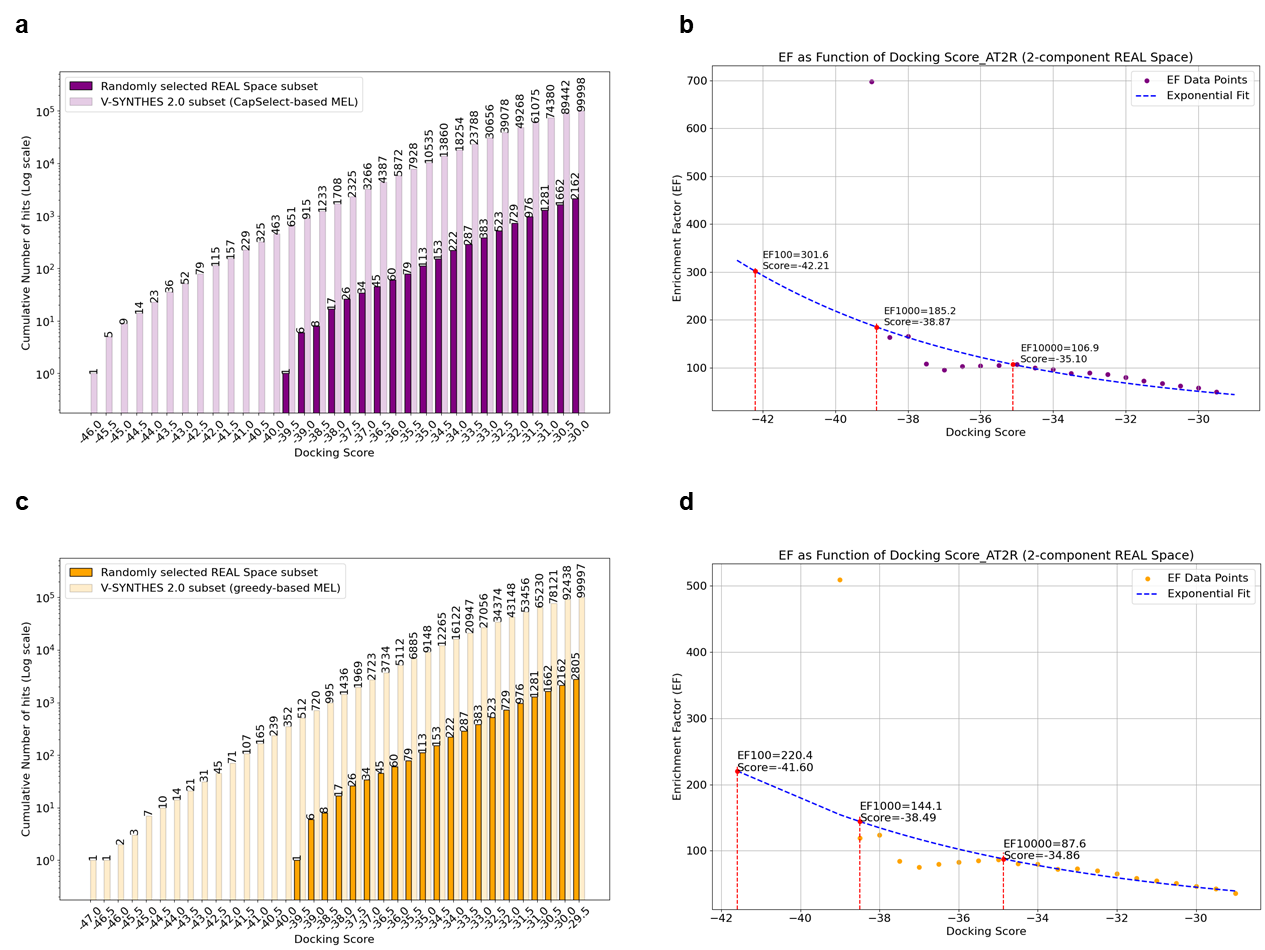
**

**Figure SI 9.** V-SYNTHES 2.0 versus conventional VLS performance for the 2-component REAL Space in the AT2 receptor screening campaign. The V-SYNTHES2 enumerated subset was derived from MEL fragments selected by (a)-(b) the CapSelect approach or (c)-(d) greedy approaches. The cumulative histogram presents the number of hits (on a logarithmic scale) against the docking score threshold in the V-SYNTHES 2.0 obtained subset and the REAL diversity (random) subset. Additionally, the scatter plot displays the enrichment factors, highlighting the superior performance of V-SYNTHES 2.0 compared to conventional VLS, with the enrichment factor for 10,000, 1000 and 100 virtual hits indicated by a star (statistically reliable enrichment factor (EF) values were identified at the 10,000 hits threshold and used for statistical comparisons. The exclusion of the leftmost points from the exponential trend line ensured reliability at this threshold, despite the less precise 1,000 and 100 hits thresholds, which were accessed only for consistency with the V-SYNTHES 1.01 methodology purposes).


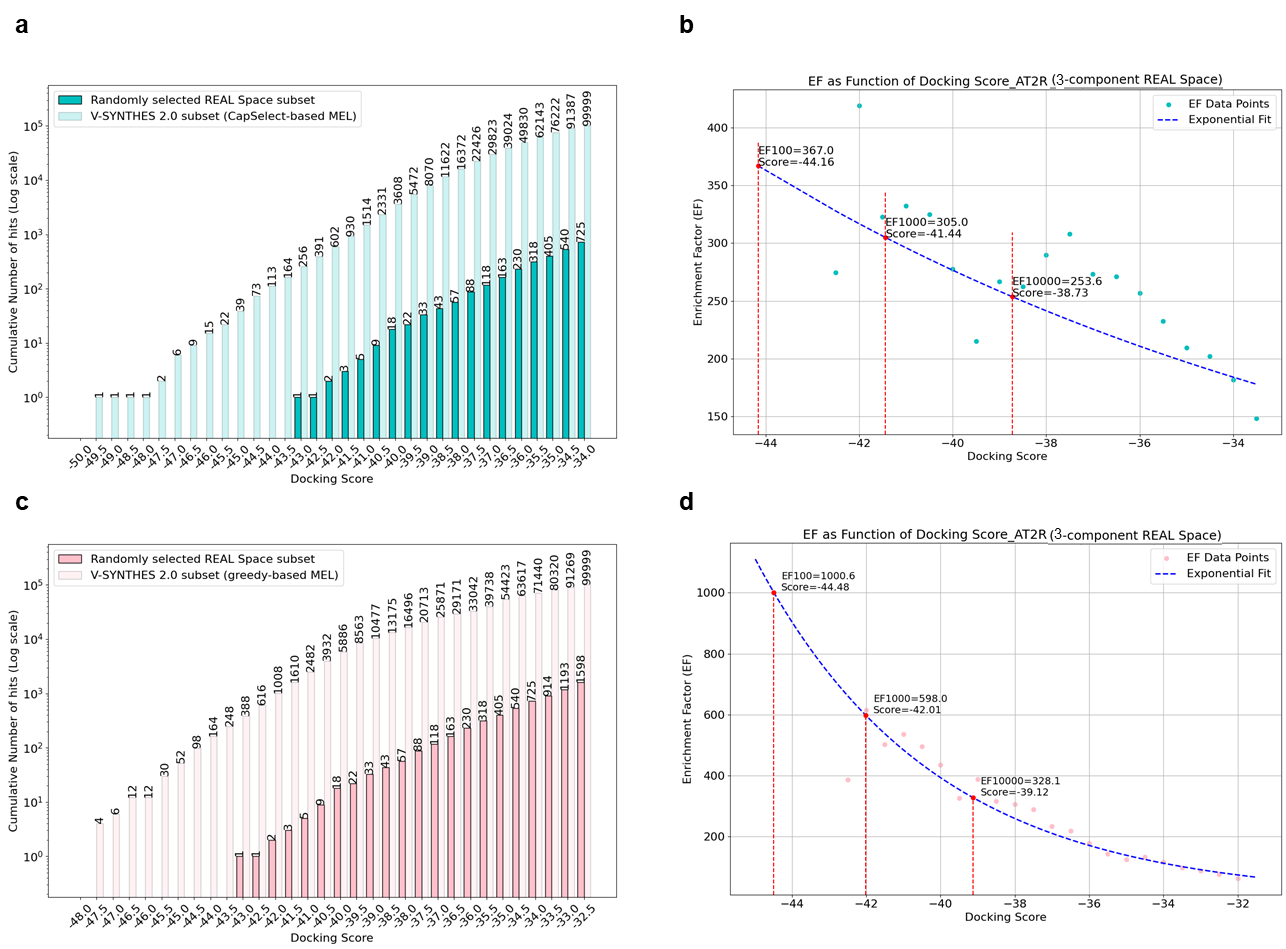


**Figure SI 10.** V-SYNTHES 2.0 versus conventional VLS performance for the 3-component REAL Space in the AT2 receptor screening campaign. The V-SYNTHES2 enumerated subset was derived from MEL fragments selected by (a)-(b) the CapSelect approach or (c)-(d) greedy approaches. The cumulative histogram presents the number of hits (on a logarithmic scale) against the docking score threshold in the V-SYNTHES 2.0 obtained subset and the REAL diversity (random) subset. Additionally, the scatter plot displays the enrichment factors, highlighting the superior performance of V-SYNTHES 2.0 compared to conventional VLS, with the enrichment factor for 10,000, 1000 and 100 virtual hits indicated by a star (statistically reliable enrichment factor (EF) values were identified at the 10,000 hits threshold and used for statistical comparisons. The exclusion of the leftmost points from the exponential trend line ensured reliability at this threshold, despite the less precise 1,000 and 100 hits thresholds, which were accessed only for consistency with the V-SYNTHES 1.01 methodology purposes).


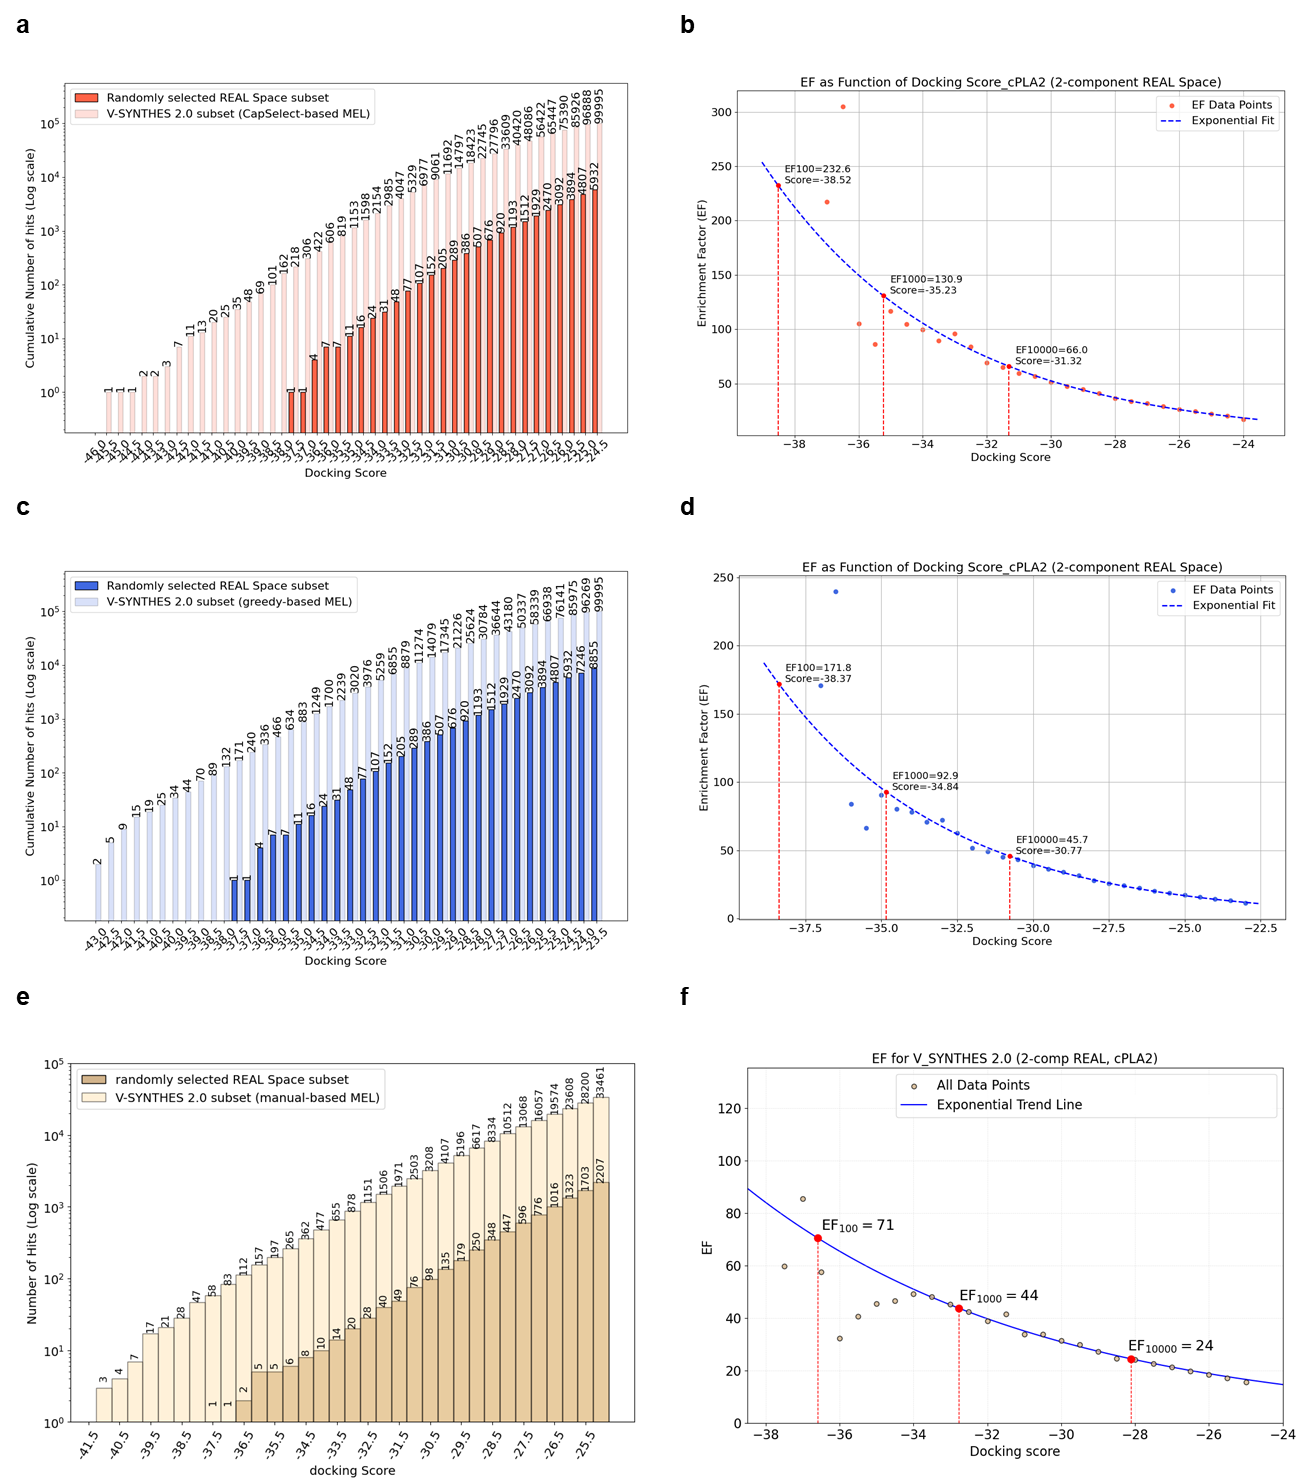


**Figure SI 11.** V-SYNTHES 2.0 versus conventional VLS performance for the 2-component REAL Space in the cPLA2 enzyme screening campaign. The V-SYNTHES2 enumerated subset was derived from MEL fragments selected by (a)-(b) the CapSelect approach or (c)-(d) greedy approaches. The cumulative histogram presents the number of hits (on a logarithmic scale) against the docking score threshold in the V-SYNTHES 2.0 obtained subset and the REAL diversity (random) subset. Additionally, the scatter plot displays the enrichment factors, highlighting the superior performance of V-SYNTHES 2.0 compared to conventional VLS, with the enrichment factor for 10,000, 1000 and 100 virtual hits indicated by a star (statistically reliable enrichment factor (EF) values were identified at the 10,000 hits threshold and used for statistical comparisons. The exclusion of the leftmost points from the exponential trend line ensured reliability at this threshold, despite the less precise 1,000 and 100 hits thresholds, which were accessed only for consistency with the V-SYNTHES 1.01 methodology purposes).


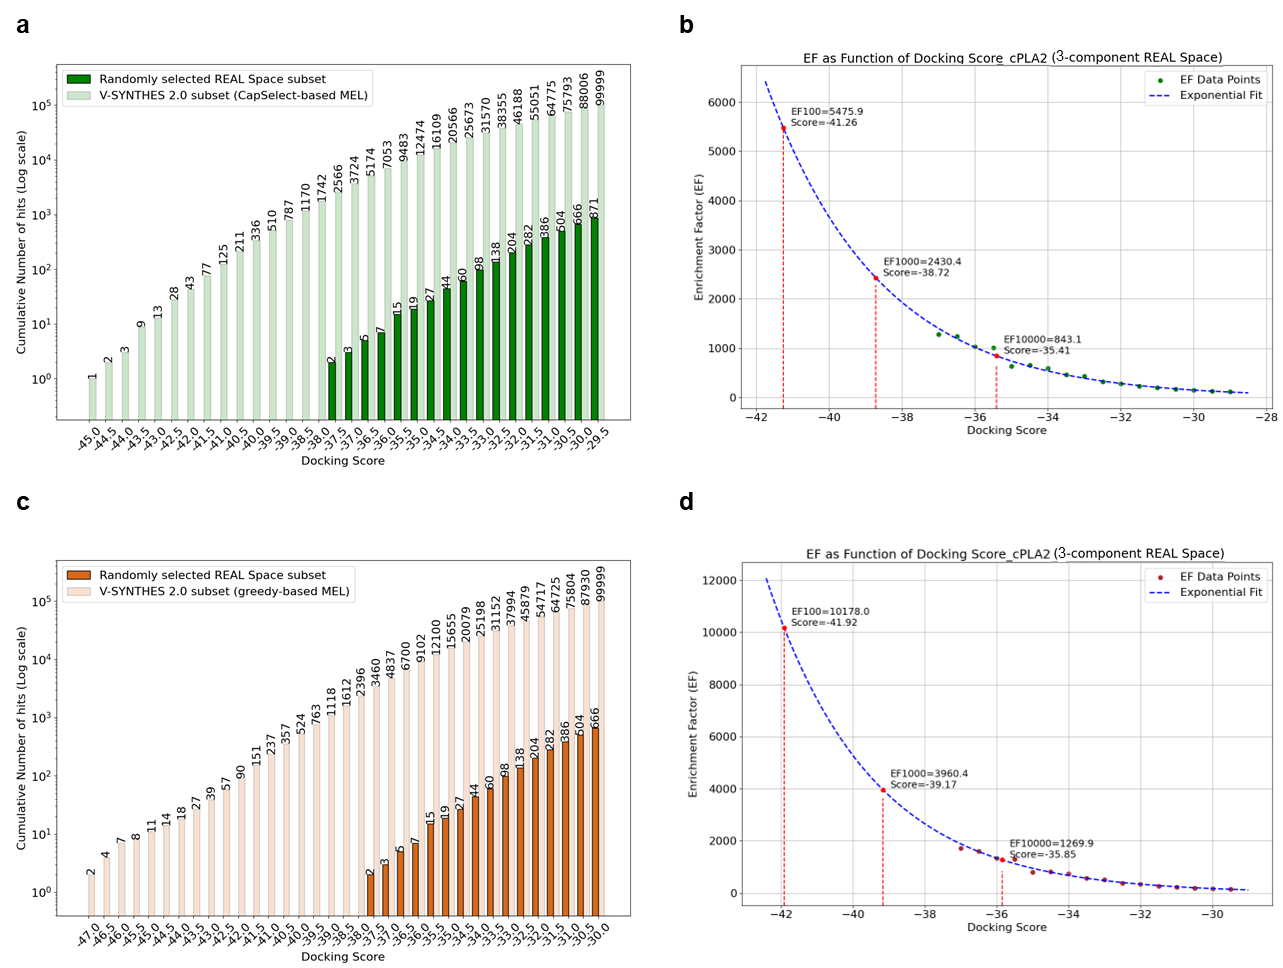


**Figure SI 12.** V-SYNTHES 2.0 versus conventional VLS performance for the 3-component REAL Space in the cPLA2 enzyme screening campaign. The V-SYNTHES2 enumerated subset was derived from MEL fragments selected by (a)-(b) the CapSelect approach or (c)-(d) greedy approaches. The cumulative histogram presents the number of hits (on a logarithmic scale) against the docking score threshold in the V-SYNTHES 2.0 obtained subset and the REAL diversity (random) subset. Additionally, the scatter plot displays the enrichment factors, highlighting the superior performance of V-SYNTHES 2.0 compared to conventional VLS, with the enrichment factor for 10,000, 1000 and 100 virtual hits indicated by a star (statistically reliable enrichment factor (EF) values were identified at the 10,000 hits threshold and used for statistical comparisons. The exclusion of the leftmost points from the exponential trend line ensured reliability at this threshold, despite the less precise 1,000 and 100 hits thresholds, which were accessed only for consistency with the V-SYNTHES 1.01 methodology purposes).

**
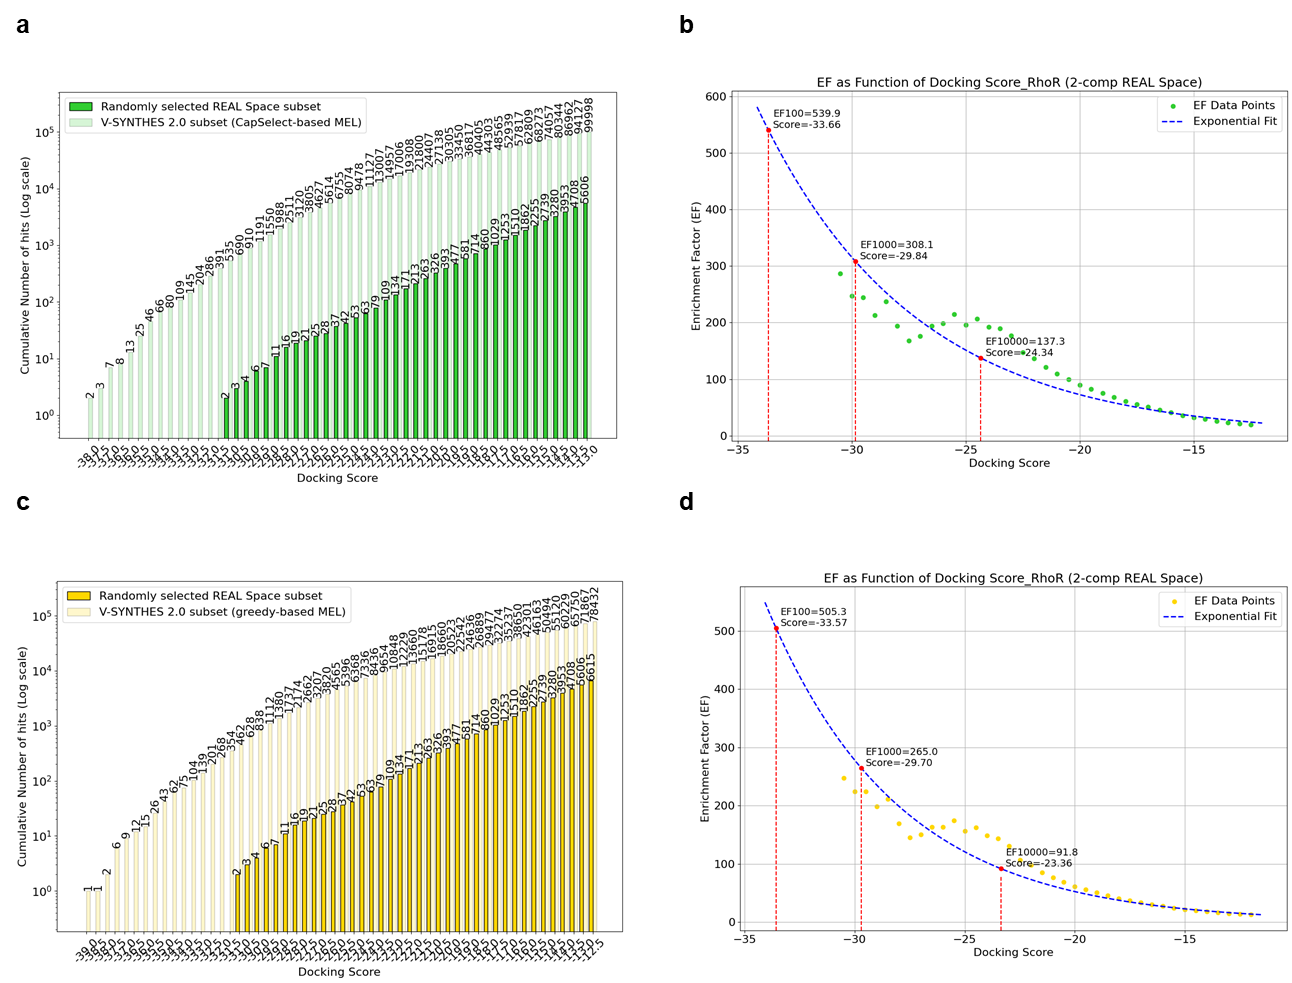
**

**Figure SI 13.** V-SYNTHES 2.0 versus conventional VLS performance for the 2-component REAL Space in the Rho receptor screening campaign. The V-SYNTHES2 enumerated subset was derived from MEL fragments selected by (a)-(b) the CapSelect approach or (c)-(d) greedy approaches. The cumulative histogram presents the number of hits (on a logarithmic scale) against the docking score threshold in the V-SYNTHES 2.0 obtained subset and the REAL diversity (random) subset. Additionally, the scatter plot displays the enrichment factors, highlighting the superior performance of V-SYNTHES 2.0 compared to conventional VLS, with the enrichment factor for 10,000, 1000 and 100 virtual hits indicated by a star (statistically reliable enrichment factor (EF) values were identified at the 10,000 hits threshold and used for statistical comparisons. The exclusion of the leftmost points from the exponential trend line ensured reliability at this threshold, despite the less precise 1,000 and 100 hits thresholds, which were accessed only for consistency with the V-SYNTHES 1.01 methodology purposes).

**
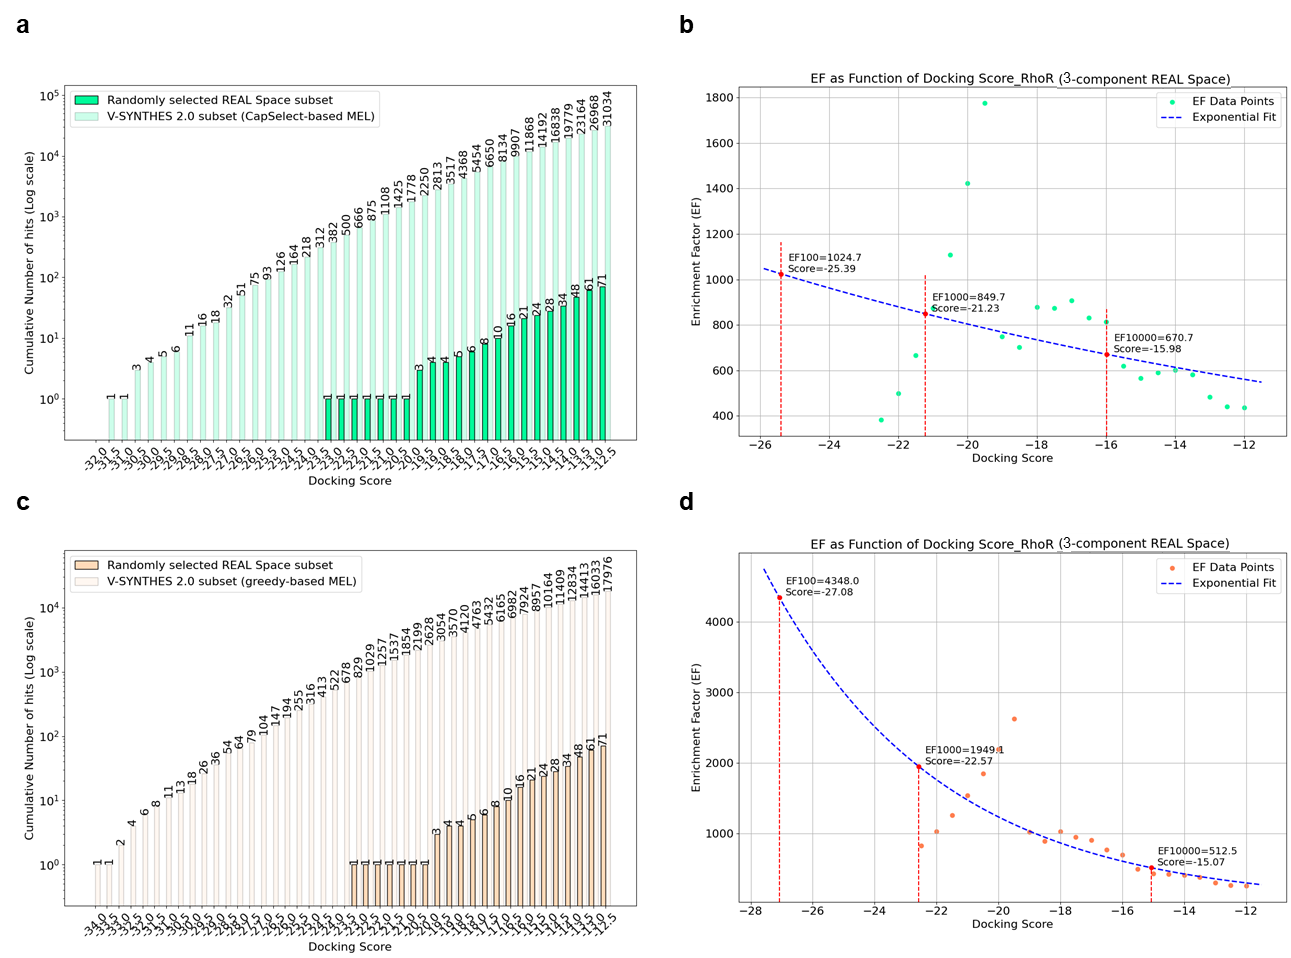
**

**Figure SI 14.** V-SYNTHES 2.0 versus conventional VLS performance for the 3-component REAL Space in the Rho receptor screening campaign. The V-SYNTHES2 enumerated subset was derived from MEL fragments selected by (a)-(b) the CapSelect approach or (c)-(d) greedy approaches. The cumulative histogram presents the number of hits (on a logarithmic scale) against the docking score threshold in the V-SYNTHES 2.0 obtained subset and the REAL diversity (random) subset. Additionally, the scatter plot displays the enrichment factors, highlighting the superior performance of V-SYNTHES 2.0 compared to conventional VLS, with the enrichment factor for 10,000, 1000 and 100 virtual hits indicated by a star (statistically reliable enrichment factor (EF) values were identified at the 10,000 hits threshold and used for statistical comparisons. The exclusion of the leftmost points from the exponential trend line ensured reliability at this threshold, despite the less precise 1,000 and 100 hits thresholds, which were accessed only for consistency with the V-SYNTHES 1.01 methodology purposes).

**Table SI 1.** RMSD statistics comparing the binding poses of the MEL fragment with the corresponding synthons of the fully enumerated molecules in the 2-component, and 3-component reaction sets of V-SYNTHES2 for AT2, cPLA2 and Rho screening pipelines. Statistics are presented for the first 100K, 10K and 1K compounds with the highest docking scores. Promising MEL fragments were chosen using either docking score-only (greedy enumeration) or CapSelect-based strategies.

| Target | AT2 | | cPLA2 | | Rho | |
| --- | --- | --- | --- | --- | --- | --- |
| **REAL Space reaction set** | **2-comp** | **3-comp** | **2-comp** | **3-comp** | **2-comp** | **3-comp** |
| first 100K best scored fully enumerated molecules | | | | | | |
| median RMSD (M), CapSelect-based subset | 0.30 | 1.05 | 0.31 | 0.26 | 0.37 | NA |
| median RMSD (M), greedy-based subset | 0.59 | 0.76 | 1.05 | 0.29 | 1.57 |
| interquartile distance (d), CapSelect-based subset | 0.31 | 2.87 | 0.52 | 0.45 | 0.715 |
| interquartile distance (d), greedy-based subset | 0.62 | 4.44 | 3.75 | 0.58 | 3.12 |
| first 10K best scored fully enumerated molecules | | | | | | |
| median RMSD (M), CapSelect-based subset | 0.33 | 1.13 | 0.19 | 0.17 | 0.20 | 4.65 |
| median RMSD (M), greedy-based subset | 0.50 | 0.68 | 0.37 | 0.18 | 0.34 | 4.66 |
| interquartile distance (d), CapSelect-based subset | 0.32 | 3.25 | 0.22 | 0.32 | 0.21 | 4.55 |
| interquartile distance (d), greedy-based subset | 0.49 | 4.17 | 0.56 | 0.46 | 0.29 | 4.51 |
| first 1K best scored fully enumerated molecules | | | | | | |
| median RMSD (M), CapSelect-based subset | 0.38 | 1.45 | 0.16 | 0.19 | 0.23 | 4.73 |
| median RMSD (M), greedy-based subset | 0.43 | 1.22 | 0.26 | 0.18 | 1.09 | 4.71 |
| interquartile distance (d), CapSelect-based subset | 0.35 | 2.43 | 0.18 | 0.45 | 0.29 | 4.44 |
| interquartile distance (d), greedy-based subset | 0.39 | 4.42 | 0.36 | 0.45 | 1.09 | 3.71 |

NA* indicates insufficient data for meaningful statistical analysis.

**Table SI 2.** Enrichment factor for 10,000 (EF10,000) virtual hits from the performance comparison of V-SYNTHES 2.0 versus conventional VLS for 2- and 3- component reaction REAL Space targeting the AT2, cPLA2 and Rho. The V-SYNTHES2 subset was generated from promising MEL fragments chosen using either docking score-only (greedy enumeration) or CapSelect-based strategies.

| Target | EF10,000 | | |
| --- | --- | --- | --- |
| **CapSelect vs. REAL diversity set** | **greedy vs. REAL diversity set** | **CapSelect vs. greedy set** |
| 2-component reaction REAL Space | | | |
| AT2 | 106.9 | 87.6 | 1.2 |
| cPLA2 | 66.0 | 45.7 | 1.4 (3.0*) |
| Rho | 137.3 | 91.8 | 1.5 |
| 3-component reaction REAL Space | | | |
| AT2 | 253.6 | 328.1 | 0.77 |
| cPLA2 | 843.1 | 1270.0 | 0.66 |
| Rho | 670.7 | 512.5 | 1.3 |

*:Obtained with 20 billion REAL Space (2021 release). A manual strategy for selecting promising MEL fragments was employed by visually assessing the binding pose and manageable growth space within the pocket.

**Table SI 3.** V-SYNTHES2 benchmarking statistics for 2-component, 3-component reaction sets for AT2, Rho and cPLA2 targets.

| Target | AT2 | | Rho | | cPLA2 | |
| --- | --- | --- | --- | --- | --- | --- |
| REAL Space reaction set | 2-comp | bridge-like | 2-comp | bridge-like | 2-comp | bridge-like |
| MEL Space, frags | 1710727 | 140000 | 1710727 | 140000 | 1710727 | 140000 |
| MEL DOCKING_SCORE_THRESHOLD, kcal/mol | -12.0 | | | | | |
| MEL docked&filtered, frags | 969359 | 76066 | 75500 | 9476 | 257155 | 16766 |
| MEL required for 1st ENUM set (CapSelect-based selection), frags | 1986 | NA | 485 | NA | 1190 | NA |
| MEL required for 1st ENUM set (greedy-based selection), frags | 2256 | 13683 | 527 | 9476 | 1359 | 12335 |
| 1st ENUM set (CapSelect-based MEL enumeration), cmpds | 981010 | NA | 986891 | NA | 980381 | NA |
| 1st ENUM set (greedy-based MELenumeration), cmpds | 984716 | 980117 | 986071 | 756380 | 981886 | 980015 |
| 1st ENUM set DOCKING_SCORE_THRESHOLD, kcal/mol | -12.0 | | | | | |
| 1st ENUM (CapSelect-based set) docked&filtered, cmpds | 871834 | NA | 109957 | NA | 563298 | NA |
| 1st ENUM (greedy-based set) docked&filtered, cmpds | 863807 | 763930 | 78432 | 9565 | 510891 | 364344 |
| MEL required for 2nd ENUM set (CapSelect-based selection), frags |  | 847 |  | 531 |  | 679 |
| MEL required for 2nd ENUM set (greedy-based selection), frags | 831 | 508 | **742** |
| 2nd ENUM set (CapSelect-based MEL enumeration), cmpds | 980495 | 980106 | 982368 |
| 2nd ENUM set (greedy-based MEL enumeration), cmpds | 981456 | 981192 | 980024 |
| 2nd ENUM (CapSelect-based set) docked&filtered, cmpds | 593822* | 31034 | 731626 |
| 2nd ENUM (greedy-based set) docked&filtered, cmpds | 504747* | 17976 | 710081 |

NA: Initial productive MEL fragments for 3-component sets were selected based on docking scores (greedy-based approach); subsequent stages used either docking score-only (greedy enumeration) or CapSelect-based strategies. The reported compound counts reflect those that passed the specified docking score threshold. For productive MEL selection using the CapSelect algorithm, we selected the top 30,000 fragments based on docking scores. For the final hit selection following full enumeration, we retained the top 10,000 docked compounds with the highest scores.

*: Docking score threshold was set at -22.

**Table SI 4.** Structural redundancy within MEL of REAL Space.

|  | 2-component MEL | 3-component MEL |
| --- | --- | --- |
| N of frags | 1710727 | 140000 |
| N of redundant frags | 593268 | 0 |
| % of redundant frags | 34.67% | 0% |

**Table SI 5.** Screening statistics confirming the successful completion of all docking jobs executed during V-SYNTHES2 benchmarking, including 2-component, 3-component reaction sets screened against AT2, CB2, and cPLA2 targets.

*2-component REAL*

| Docking Job | *AT2_MEL* | *AT2_CapSelect* | *AT2_greedy* | *RHO_MEL* | *RHO_CapSelect* | *RHO_greedy* | *cPLA2_MEL* | *cPLA2_CapSelect* | *cPLA2_greedy* |
| --- | --- | --- | --- | --- | --- | --- | --- | --- | --- |
| 1 | 49888 | 39963 | 39968 | 49986 | 39989 | 39992 | 49988 | 39995 | 39995 |
| 2 | 49930 | 39959 | 39966 | 49997 | 39996 | 39993 | 49992 | 39991 | 39994 |
| 3 | 49939 | 39956 | 39966 | 49995 | 39992 | 39993 | 49989 | 39995 | 39993 |
| 4 | 49943 | 39967 | 39964 | 49994 | 39995 | 39994 | 49988 | 39992 | 39989 |
| 5 | 49920 | 39972 | 39960 | 49994 | 39995 | 39991 | 49993 | 39992 | 39994 |
| 6 | 49903 | 39958 | 39949 | 49991 | 39994 | 39992 | 49990 | 39991 | 39991 |
| 7 | 49915 | 39961 | 39968 | 49993 | 39996 | 39994 | 49987 | 39986 | 39990 |
| 8 | 49933 | 39958 | 39956 | 49986 | 39993 | 39994 | 49987 | 39993 | 39994 |
| 9 | 49935 | 39970 | 39970 | 49989 | 39989 | 39994 | 49990 | 39994 | 39993 |
| 10 | 49939 | 39971 | 39970 | 49987 | 39993 | 39992 | 49987 | 39995 | 39994 |
| 11 | 49946 | 39967 | 39983 | 49988 | 39998 | 39991 | 49982 | 39990 | 39991 |
| 12 | 49947 | 39961 | 39969 | 49984 | 39986 | 39992 | 49991 | 39987 | 39984 |
| 13 | 49914 | 39945 | 39975 | 49995 | 39996 | 39992 | 49982 | 39991 | 39994 |
| 14 | 49919 | 39963 | 39964 | 49994 | 39992 | 39992 | 49989 | 39992 | 39992 |
| 15 | 49917 | 39955 | 39965 | 49991 | 39993 | 39995 | 49991 | 39995 | 39991 |
| 16 | 49921 | 39963 | 39955 | 49992 | 39986 | 39990 | 49993 | 39991 | 39994 |
| 17 | 49948 | 39972 | 39952 | 49991 | 39993 | 39990 | 49993 | 39991 | 39991 |
| 18 | 49955 | 39952 | 39967 | 10724 | 39993 | 39994 | 10725 | 39993 | 39996 |
| 19 | 49948 | 39952 | 39937 | 49978 | 39989 | 39993 | 49989 | 39994 | 39997 |
| 20 | 49894 | 39973 | 39953 | 49994 | 39992 | 39993 | 49994 | 39994 | 39992 |
| 21 | 49945 | 39964 | 39966 | 49981 | 39991 | 39990 | 49989 | 39995 | 39993 |
| 22 | 49930 | 39972 | 39973 | 49987 | 39992 | 39990 | 49987 | 39995 | 39994 |
| 23 | 49938 | 39959 | 39979 | 49985 | 39992 | 39994 | 49988 | 39992 | 39991 |
| 24 | 49943 | 39965 | 39965 | 49995 | 39992 | 39988 | 49990 | 39989 | 39987 |
| 25 | 49933 | 20996 | 24687 | 49990 | 26887 | 26067 | 49990 | 20377 | 21882 |
| 26 | 49921 |  |  | 49992 |  |  | 49995 |  |  |
| 27 | 49939 | 49989 | 49990 |
| 28 | 49932 | 49986 | 49982 |
| 29 | 49936 | 49992 | 49990 |
| 30 | 49940 | 49993 | 49995 |
| 31 | 49931 | 49994 | 49996 |
| 32 | 49945 | 49991 | 49989 |
| 33 | 49947 | 49992 | 49991 |
| 34 | 49942 | 49982 | 49987 |
| 35 | 10716 | 49987 | 49987 |
| SUM | **1708392** | **980094** | **983827** | **1710379** | **986704** | **985880** | **1710366** | **980190** | **981696** |

*3-component REAL*

| Docking Job | *AT2_MEL* | *AT2_greedy_1st*ENUM | *AT2_CapSelect_*2nd ENUM | *AT2_greedy_*2nd ENUM | *RHO_MEL* | *RHO_greedy_1st*ENUM | *RHO_CapSelect_*2nd ENUM | *RHO_greedy_*2nd ENUM | *cPLA2_MEL* | *cPLA2_greedy_1st*ENUM | *cPLA2_CapSelect_*2nd ENUM | *cPLA2_greedy_*2nd ENUM |
| --- | --- | --- | --- | --- | --- | --- | --- | --- | --- | --- | --- | --- |
| 1 | 1000 | 39929 | 39980 | 39970 | 1000 | 39992 | 39997 | 39995 | 1000 | 39996 | 39999 | 39998 |
| 2 | 1000 | 39937 | 39963 | 39952 | 1000 | 39994 | 39999 | 39998 | 1000 | 39995 | 39999 | 39997 |
| 3 | 1000 | 39941 | 39974 | 39970 | 1000 | 39993 | 39997 | 39997 | 1000 | 39992 | 40000 | 39999 |
| 4 | 998 | 39922 | 39973 | 39966 |  | 39992 | 39992 | 39994 | 998 | 39995 | 39998 | 39999 |
| 5 | 999 | 39932 | 39970 | 39974 |  | 39996 | 39999 | 39996 | 1000 | 39988 | 39997 | 39997 |
| 6 | 1000 | 39928 | 39973 | 39951 |  | 39997 | 39998 | 39995 | 1000 | 39998 | 40000 | 40000 |
| 7 | 999 | 39916 | 39970 | 39970 |  | 39989 | 39998 | 39997 | 999 | 39995 | 39997 | 39998 |
| 8 | 1000 | 1147 | 1000 | 39973 | 39978 | 39993 | 39999 | 39997 | 1000 | 39974 | 39998 | 39998 |
| 9 | 999 | 39944 | 1000 | 39977 | 39980 | 39993 | 39999 | 39995 | 1000 | 39990 | 39998 | 39996 |
| 10 | 305 | 39925 | 304 | 39962 | 39967 | 39993 | 39995 | 39992 | 305 | 39998 | 39996 | 39997 |
| 11 | 1000 |  | 1000 | 39967 | 39967 | 39996 | 39998 | 39996 | 1000 | 39995 | 39994 | 39998 |
| 12 | 1000 | 1000 | 39983 | 39960 | 39987 | 39999 | 39997 | 1000 | 39995 | 39997 | 39998 |
| 13 | 999 | 1000 | 39962 | 39971 | 39991 | 39997 | 39992 | 1000 | 39995 | 39997 | 39999 |
| 14 | 998 | 1000 | 39974 | 39964 | 39994 | 39997 | 39997 | 1000 | 39995 | 39996 | 39998 |
| 15 | 997 | 1000 | 39973 | 39970 | 39996 | 39995 | 39999 | 999 | 39992 | 39997 | 39999 |
| 16 | 998 | 999 | 39964 | 39974 | 39994 | 39999 | 39997 | 999 | 39992 | 39996 | 39998 |
| 17 | 999 | 1000 | 39973 | 39969 | 36376 | 39998 | 39996 | 1000 | 39993 | 39999 | 39996 |
| 18 | 996 | 1000 | 39976 | 39967 | 39992 | 39997 | 39995 | 1000 | 39992 | 39994 | 39999 |
| 19 |  |  | 39976 | 39980 |  | 39997 | 40000 |  | 39997 | 39998 | 39999 |
| 20 | 39963 | 39962 | 39998 | 39996 | 39997 | 39999 | 39998 |
| 21 | 39968 | 39965 | 40000 | 39995 | 39995 | 39997 | 39999 |
| 22 | 39962 | 39961 | 39999 | 39998 | 39997 | 39998 | 39999 |
| 23 | 39975 | 39974 | 39996 | 39999 | 39995 | 39995 | 39997 |
| 24 | 39960 | 39973 | 39997 | 39997 | 39994 | 39997 | 39998 |
| 25 | 20471 | 21434 | 20105 | 21191 | 20012 | 22367 | 20024 |
| SUM | **17287** | **360521** | **290106** | **979712** | **703916** | **716258** | **980045** | **981101** | **17300** | **979857** | **982303** | **979978** |

**Table SI 6.** Postprocessing results for 10,000 compounds received from V-SYNHTES2 screenings for AT2 and cPLA2 proteins.

| **Target** | **AT2** | | **cPLA2** | | |
| --- | --- | --- | --- | --- | --- |
|  | 2-comp | 3-comp | 2-comp | | 3-comp |
|  | | | | | |
| PAINS* > 0.5 | 0.16% | 0% | 0.3% | | 0% |
| Tox class** > 0.5 | 1.2% | 3.1% | 2.3% | | 12% |
| Tox score** > 1 | 11% | 19.7% | 12% | | 17% |
| Bad groups | 13% | 31% | 12% | | 34% |
| Predicted logS < -5 | 15% | 11% | 5% | | 1.3% |
| Predicted logS < -6 | 0.6% | 0.27% | 0.16% | | 0% |
| Duplicates | 11% | 0.16% | 3.8% | | 0.3% |
| Diversity | | | | | |
| N of clusters at Tanimoto = 0.3  (N of singletons)  (Molsoft fingerprints) | 1315  (513) | 1271  (351) | 1517  (688) | 640  (218) | |
| N of clusters at Tanimoto = 0.3  (N of singletons)  (ECFP) | 4531  (2536) | 3957  (2019) | 5480  (3379) | 3330  (1434) | |

* Predict Pan Assay Interference Compound (PAINS) as predicted by ICM-Pro, a value >0.5 indicates high probability of being a PAINS Compound

** The Tox Score by ICM-Pro gives a prediction for how reactive or toxic a chemical is. Tox Score >1. indicates substructure/substituent that is flagged as unfavorable, Tox Class > 0.5 indicates toxic compound

LITERATURE

(1) Sadybekov, A. A.; Sadybekov, A. V.; Liu, Y.; Iliopoulos-Tsoutsouvas, C.; Huang, X.-P.; Pickett, J.; Houser, B.; Patel, N.; Tran, N. K.; Tong, F.; et al. Synthon-based ligand discovery in virtual libraries of over 11 billion compounds. *Nature* **2021**, *601* (7893), 452-459. DOI: 10.1038/s41586-021-04220-9.
